# Supplementary material for: Metal nanoparticles at grain boundaries of titanate toward efficient carbon dioxide electrolysis
Source: Royal Society of Chemistry journal article supplement (doi:10.1039/d2ta02601e), 2022-01-01
Supplement: d2ta02601e1.pdf [file d2ta02601e1.pdf]

## Supplementary Information

# Metal nanoparticles at grain boundaries of titanate toward efficient carbon dioxide electrolysis

Zhibo Shang,<sup>abcd</sup> Jie Zhang,<sup>abcd</sup> Lingting Ye <sup>\*bcd</sup> and Kui Xie<sup>\*abcd</sup>

<sup>a</sup>College of Chemistry, Fuzhou University, Fuzhou 350108, Fujian, China. E-mail: [kxie@fjirsm.ac.cn](mailto:kxie@fjirsm.ac.cn); Fax: +86-591-63179173; Tel: +86-591-63179173

<sup>b</sup>Fujian Science & Technology Innovation Laboratory for Optoelectronic Information of China, Fuzhou, Fujian 350108, China. E-mail: [ltye@fjirsm.ac.cn](mailto:ltye@fjirsm.ac.cn)

<sup>c</sup>Key Laboratory of Optoelectronic Materials Chemistry and Physics, Fujian Institute of Research on the Structure of Matter, Chinese Academy of Sciences, Fuzhou, Fujian 350002, China.

<sup>d</sup>Key Laboratory of Design & Assembly of Functional Nanostructures, Chinese Academy of Sciences, Fuzhou, Fujian 350002, China.

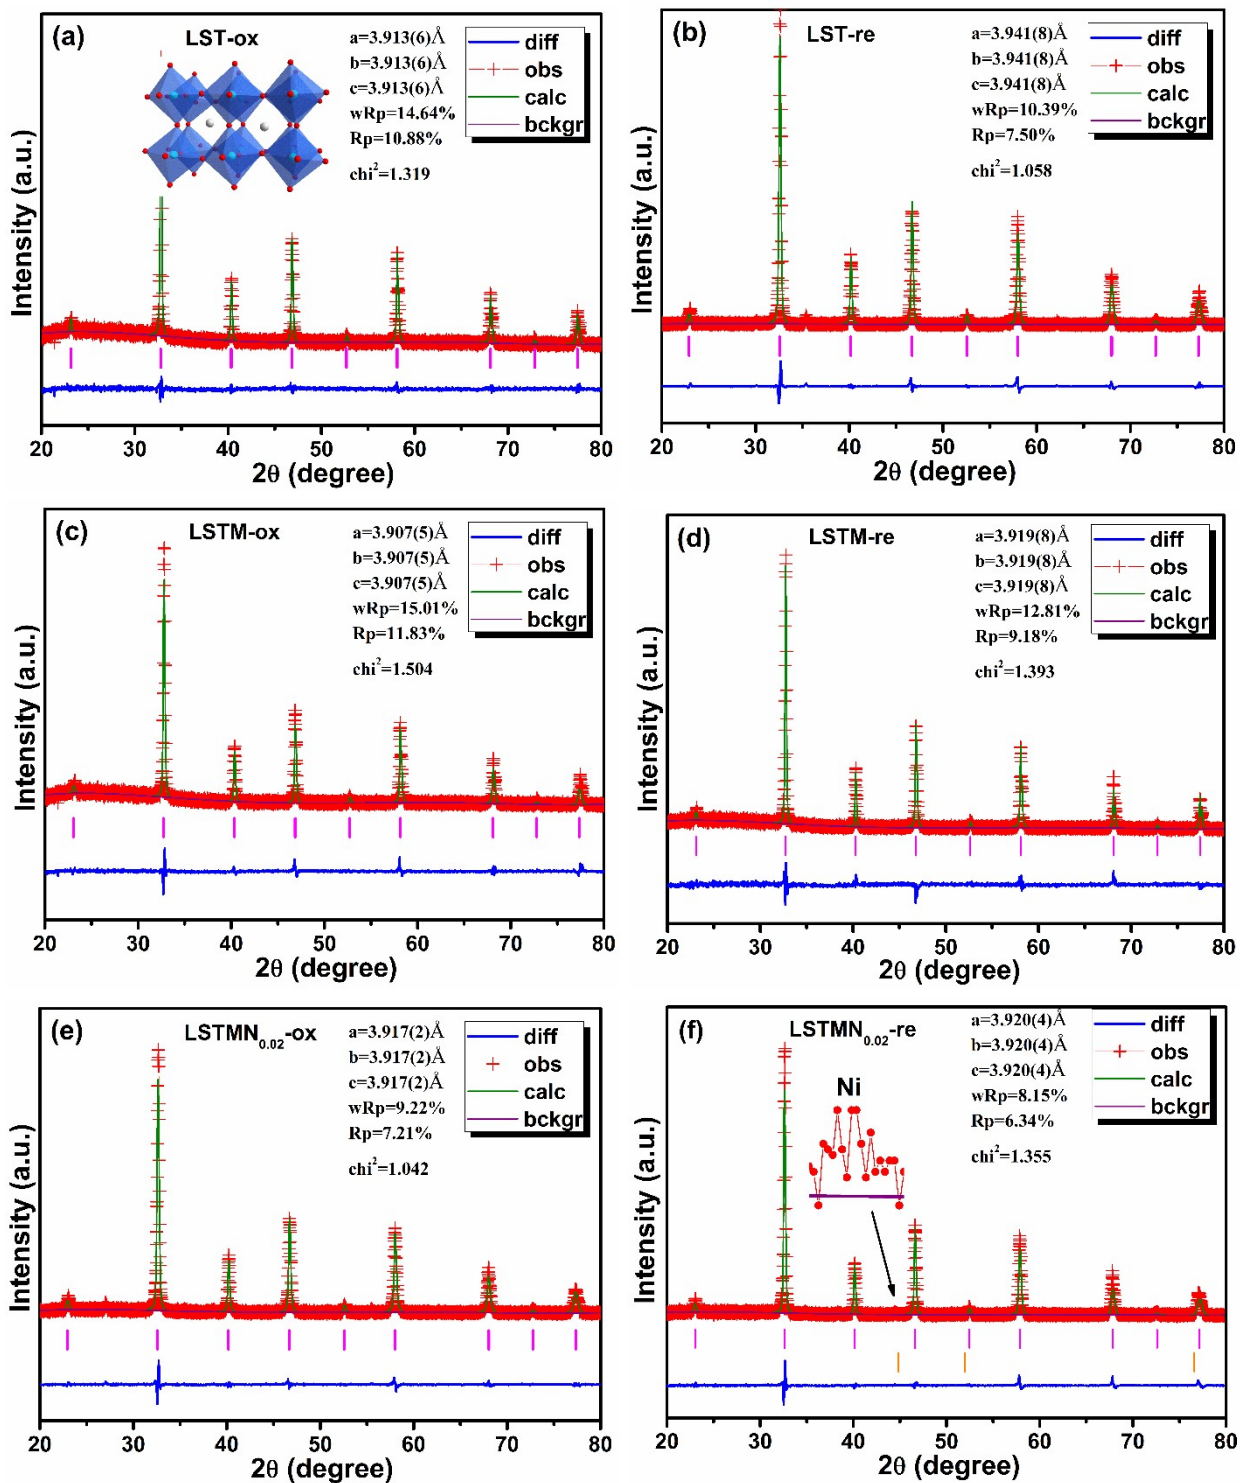

**Fig. S1** XRD rietveld refinement patterns of the (a) oxidized and (b) reduced LST; (c) oxidized and (d) reduced LSTM; (e) oxidized and (f) reduced LSTMN<sub>0.02</sub>.

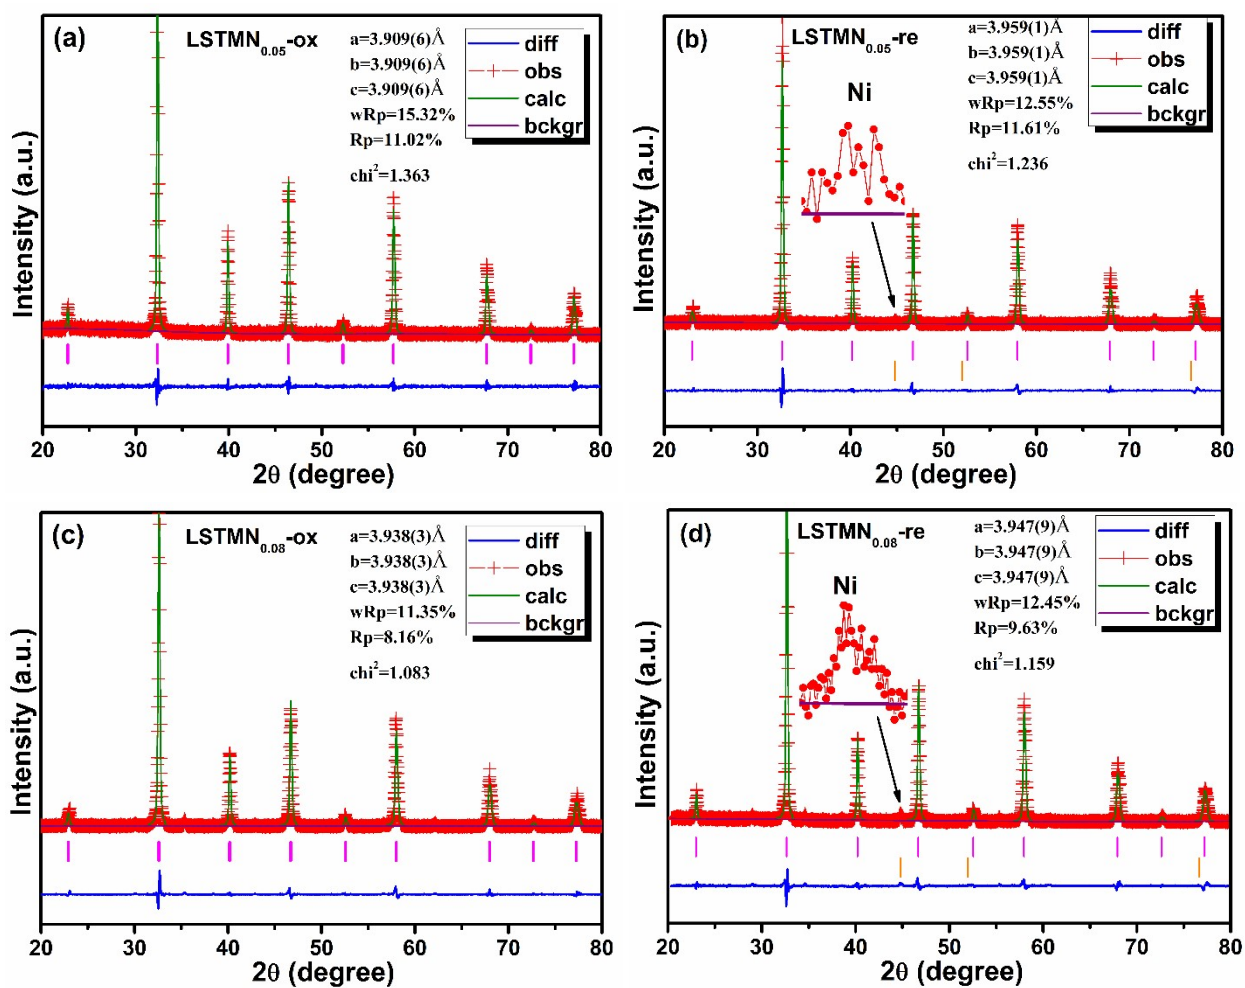

Fig. S2 XRD rietveld refinement patterns of the (a) oxidized and (b) reduced LSTMN<sub>0.05</sub>; (c) oxidized and (d) reduced LSTMMN<sub>0.08</sub>.

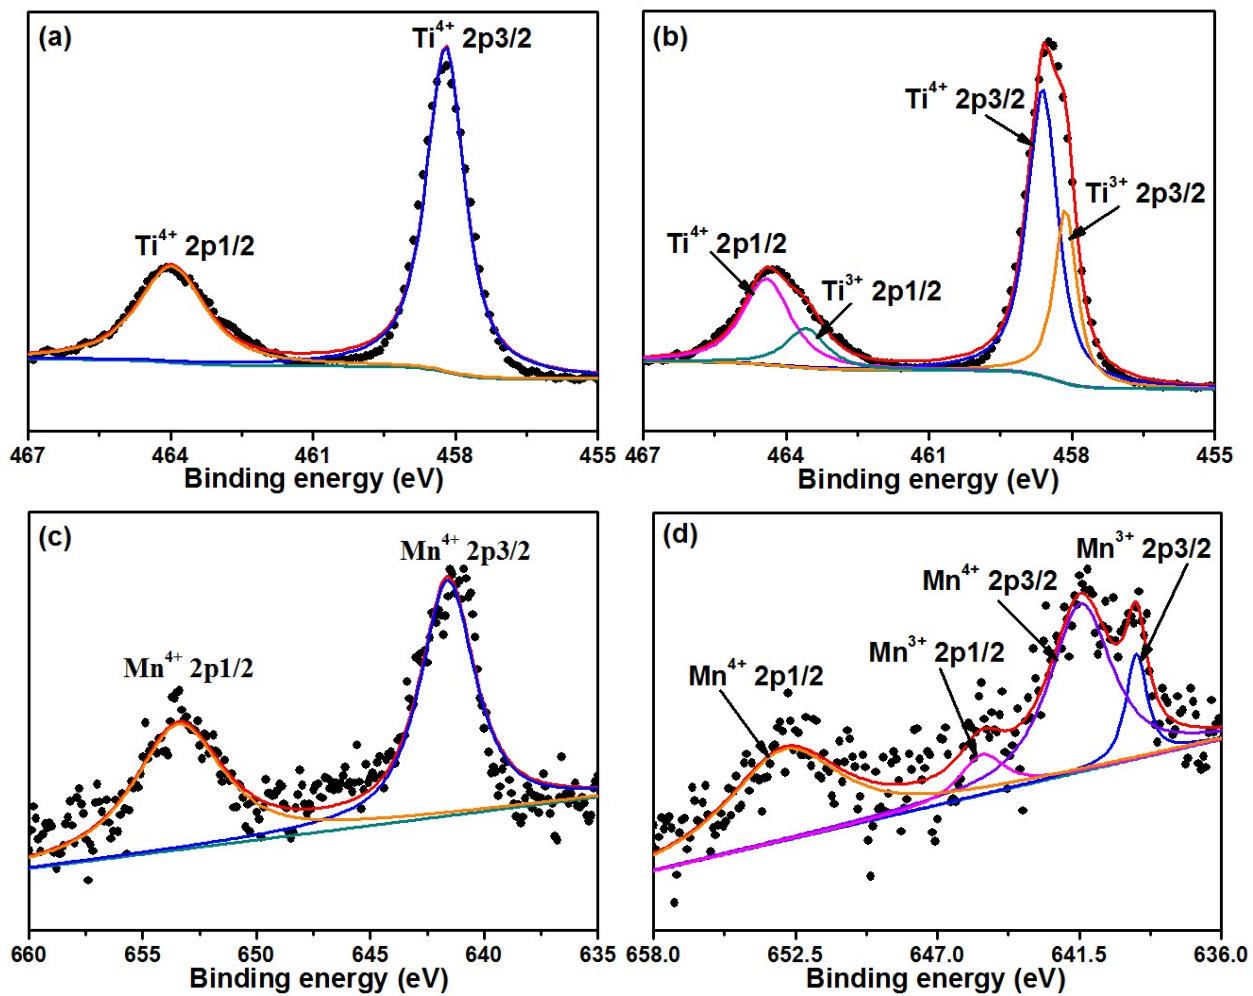

Fig. S3 XPS results of Ti and Mn in the (a, c) oxidized and (b, d) reduced LSTM, respectively.

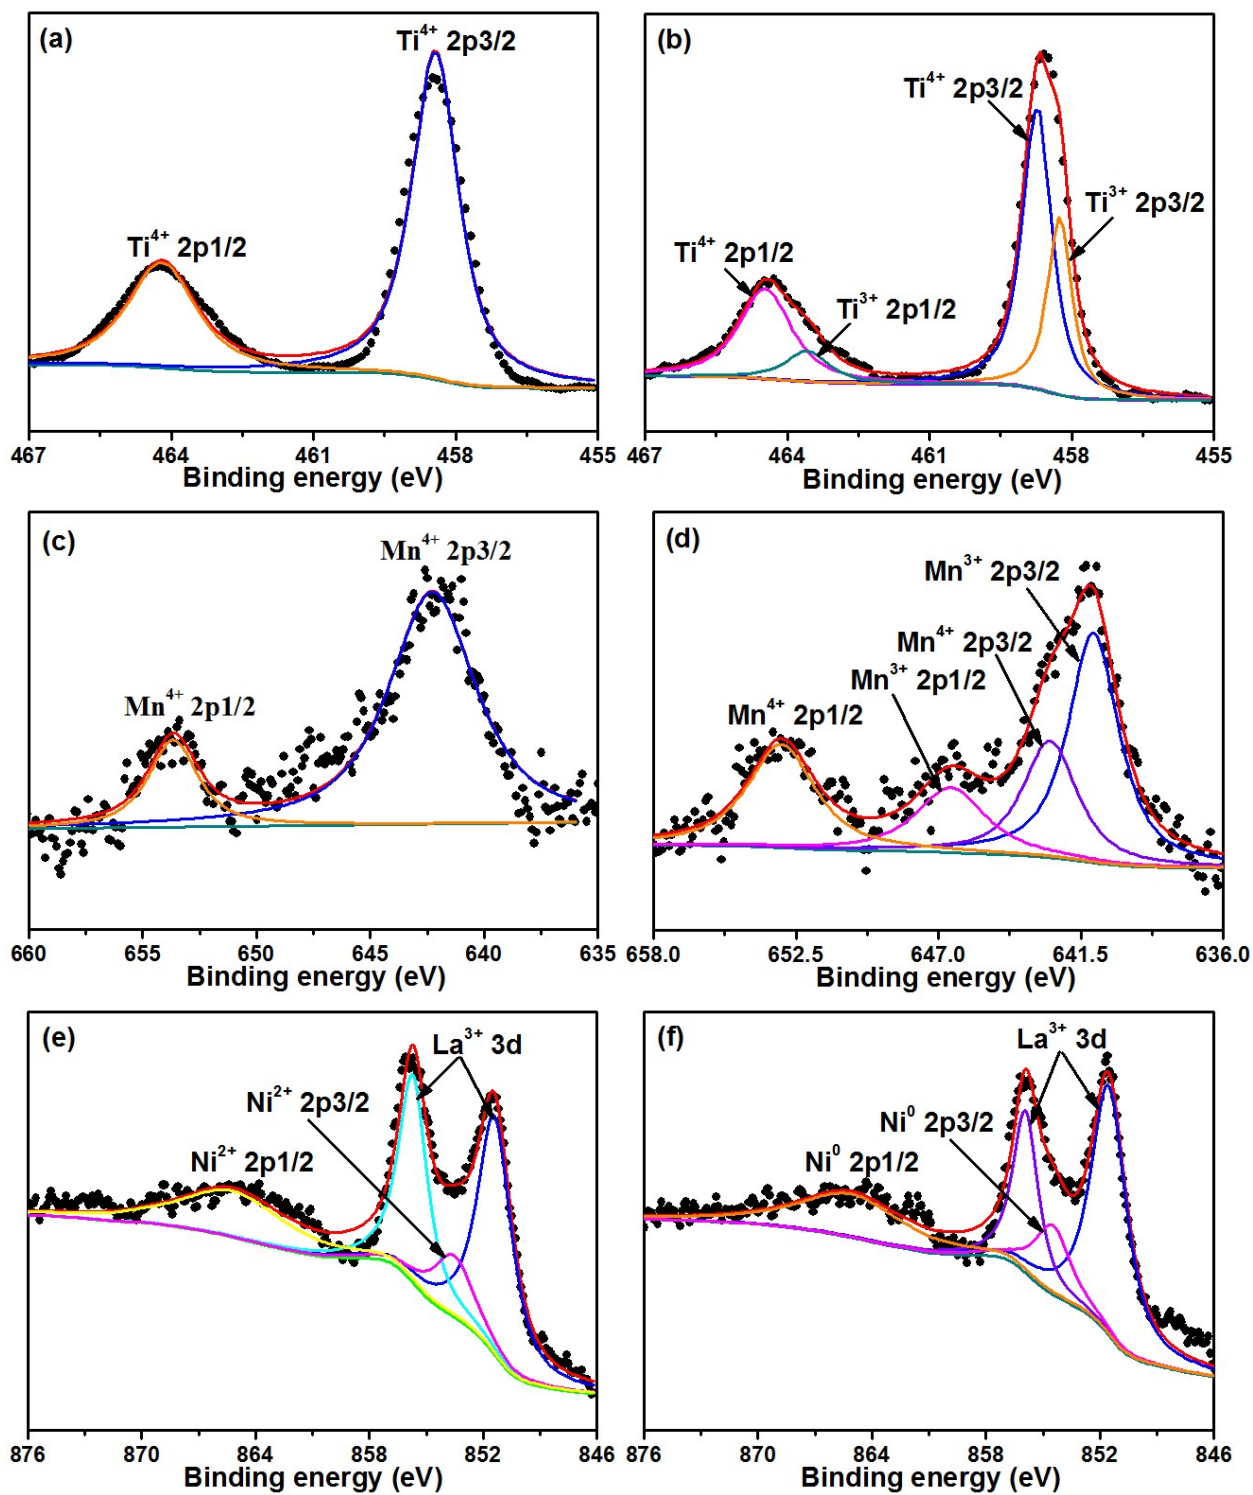

Fig. S4 XPS results of Ti, Mn and Ni in the (a, c, e) oxidized and (b, d, f) reduced LSTMN<sub>0.1</sub>, respectively.

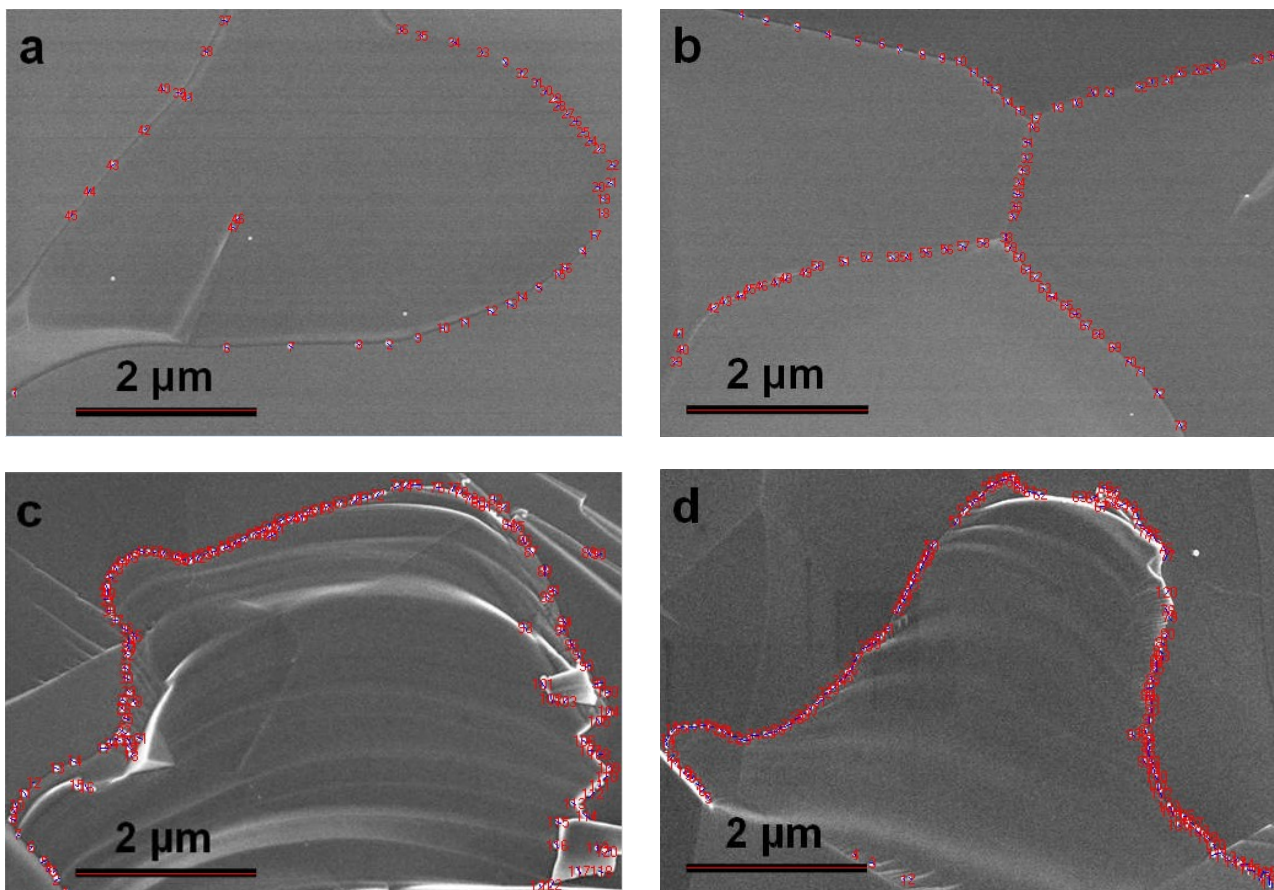

**Fig. S5** The number of all selected nickel nanoparticles at grain boundaries in titanate from the SEM results for the reduced (a) LSTMN<sub>0.02</sub>, (b) LSTMN<sub>0.05</sub>, (c) LSTMN<sub>0.08</sub> and (d) LSTMN<sub>0.1</sub>.

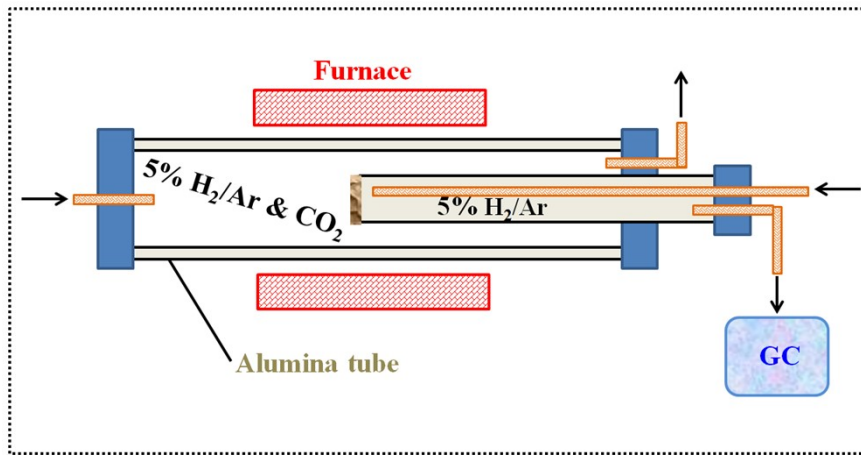

**Fig. S6** Schematic illustration of oxygen permeation flux measurement device.

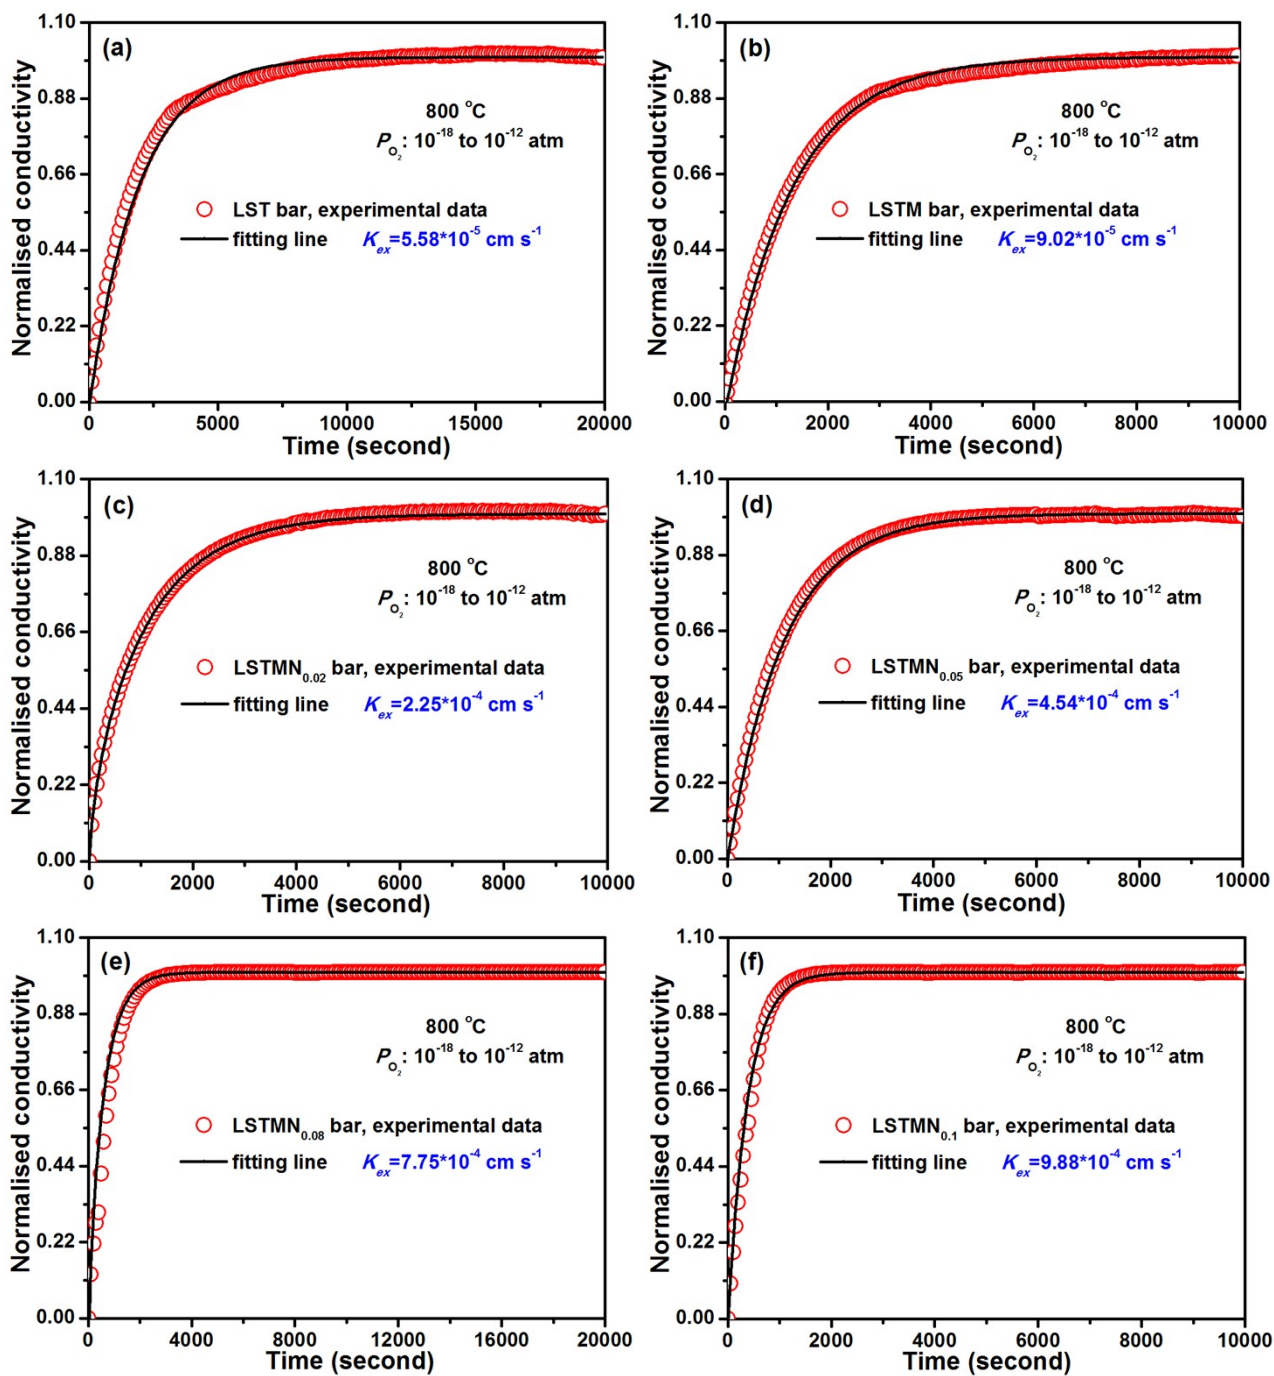

Fig. S7 Electrical conductivity relaxation curves of reduced (a) LST, (b) LSTM, (c) LSTMN<sub>0.02</sub>, (d) LSTMN<sub>0.05</sub>, (e) LSTMN<sub>0.08</sub> and (f) LSTMN<sub>0.1</sub> at 800 °C.



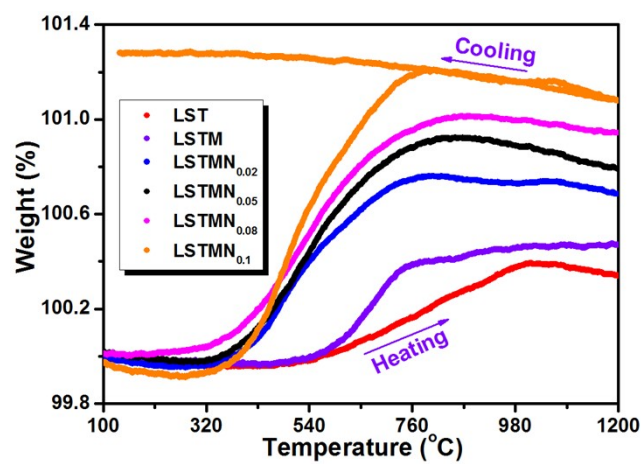

Fig. S8 TGA tests of the reduced samples from 100 to 1200 °C in air.

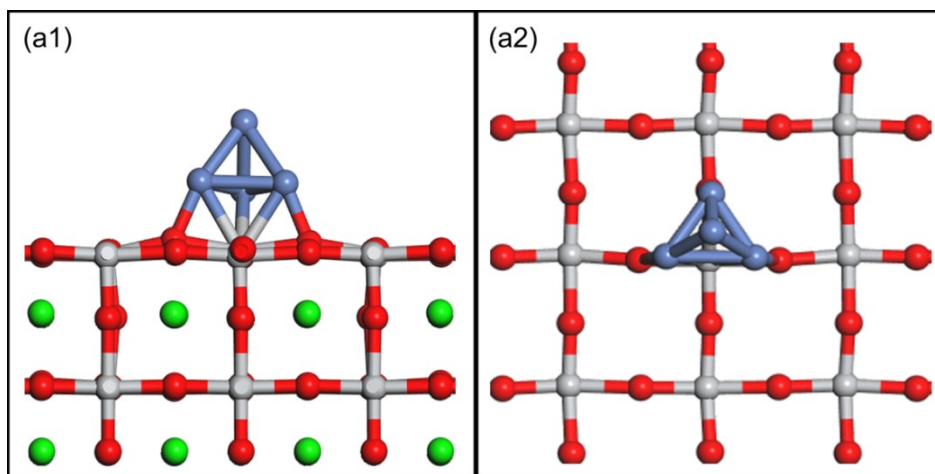

**Fig. S9** The configurations of clean (001) Ni/STO system surface, and the left panel shows side view while right panel gives top view. Nickel in blue, strontium in green, titanium in pale and oxygen in red.

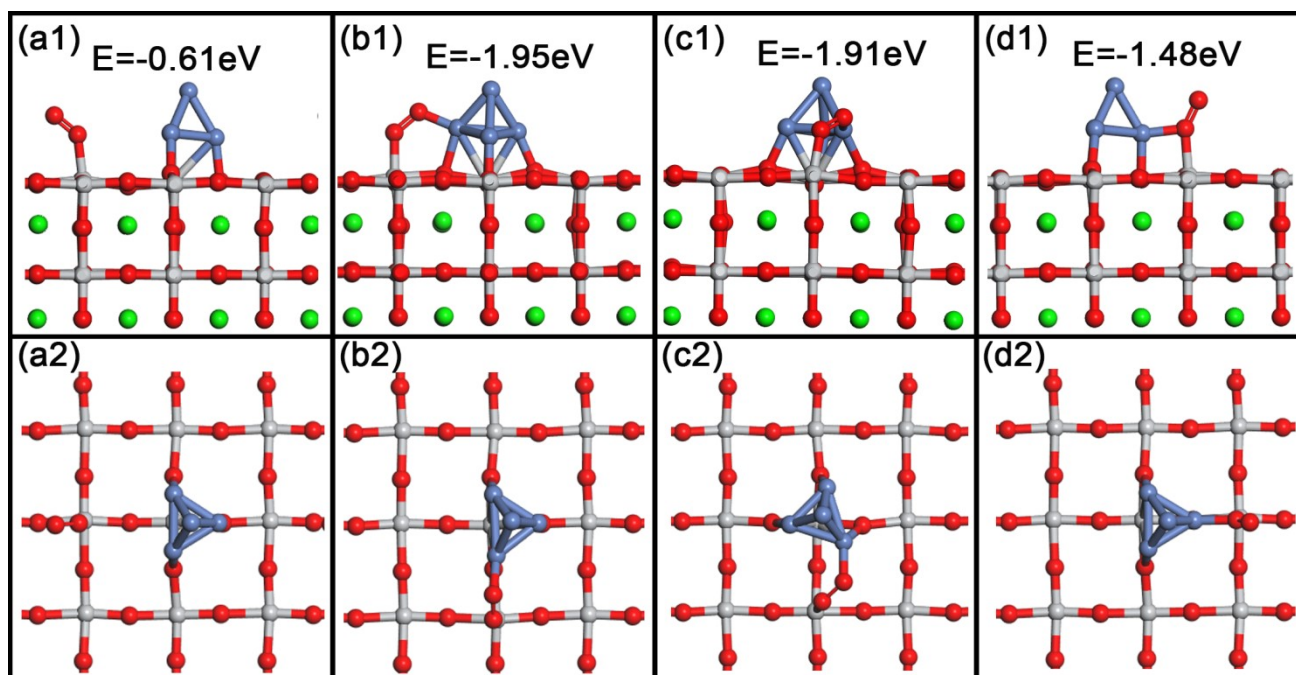

**Fig. S10** Different adsorption configurations of  $O_2$  on the (001) Ni/STO system surface. And each  $O_2$  chemisorption energy is given on the top of configuration with eV unit. Nickel in blue, strontium in green, titanium in pale and oxygen in red.

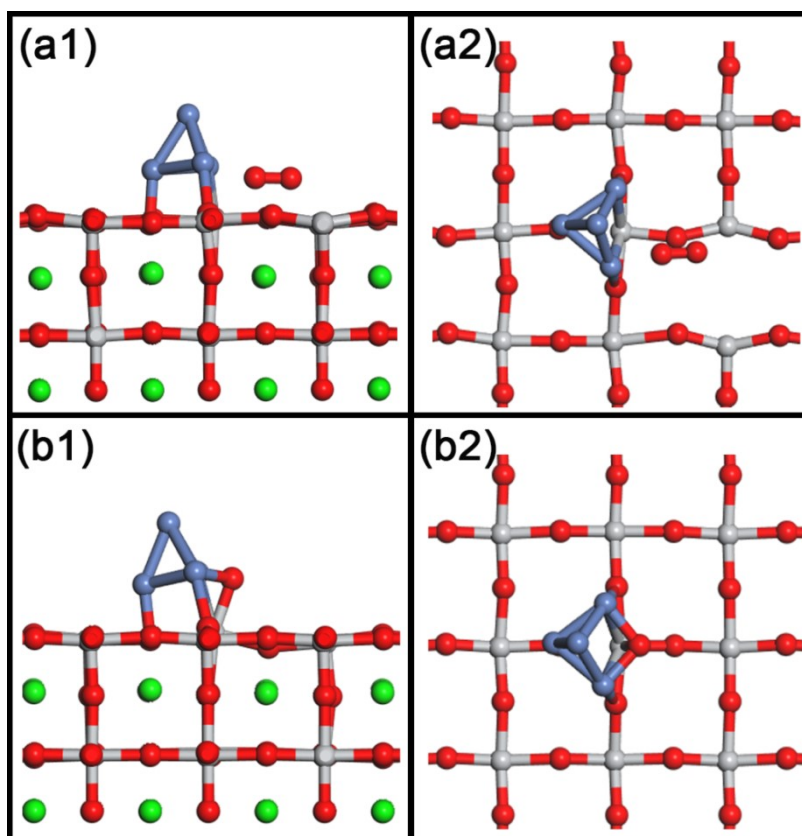

**Fig. S11** (a) The original configurations of O<sub>2</sub> approach to defected site of the (001) Ni/STO surface system; (b) the optimization configurations of O<sub>2</sub> approach to defected site of the (001) Ni/STO surface system. Left panels show side views while right panels give top views. Nickel in blue, strontium in green, titanium in pale and oxygen in red.

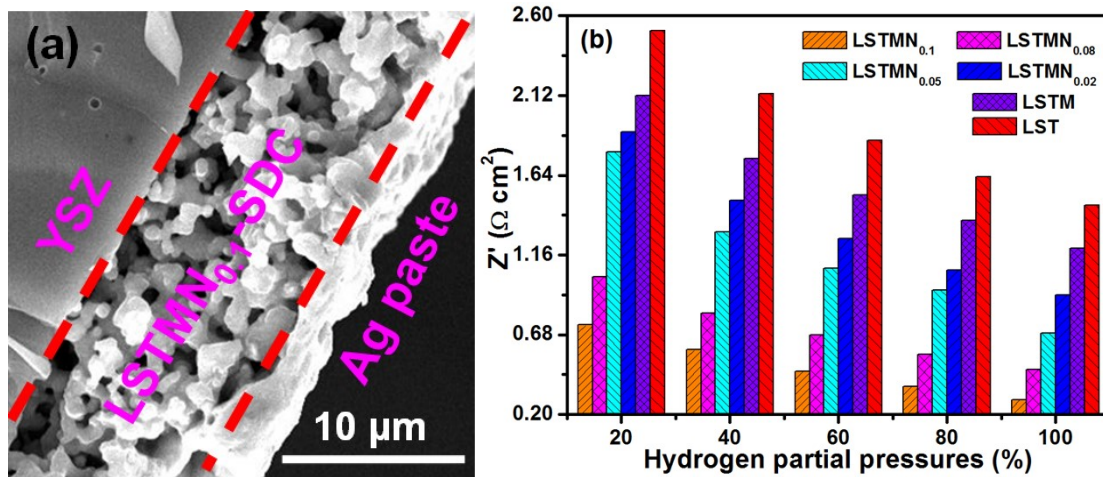

**Fig. S12** (a) SEM picture of the LSTMN<sub>0.1</sub>-SDC electrode on the YSZ electrolyte; (b) the AC impedance of the symmetric cells for samples at various H<sub>2</sub> partial pressures at 800 °C.

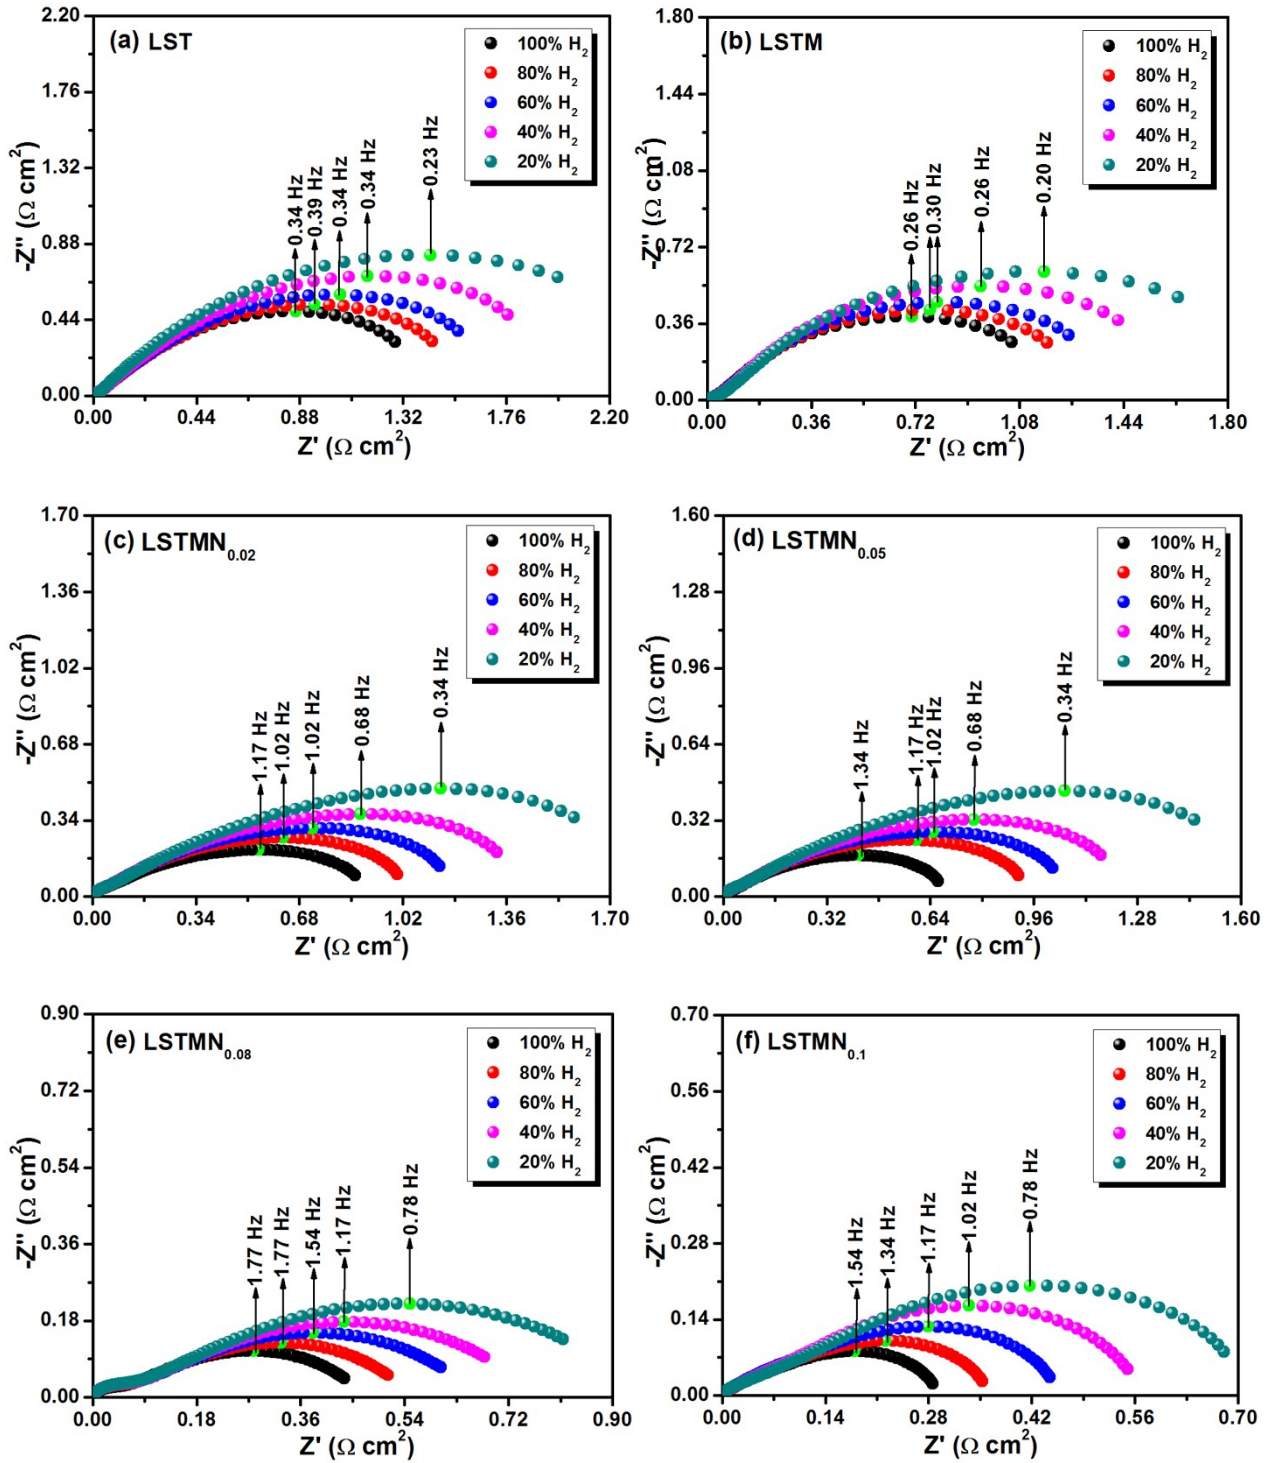

**Fig. S13** The AC impedance of the symmetric cells for (a) LST, (b) LSTM, (c) LSTMN<sub>0.02</sub>, (d) LSTMN<sub>0.05</sub>, (e) LSTMN<sub>0.08</sub> and (f) LSTMN<sub>0.1</sub> at various H<sub>2</sub> partial pressures at 800 °C.

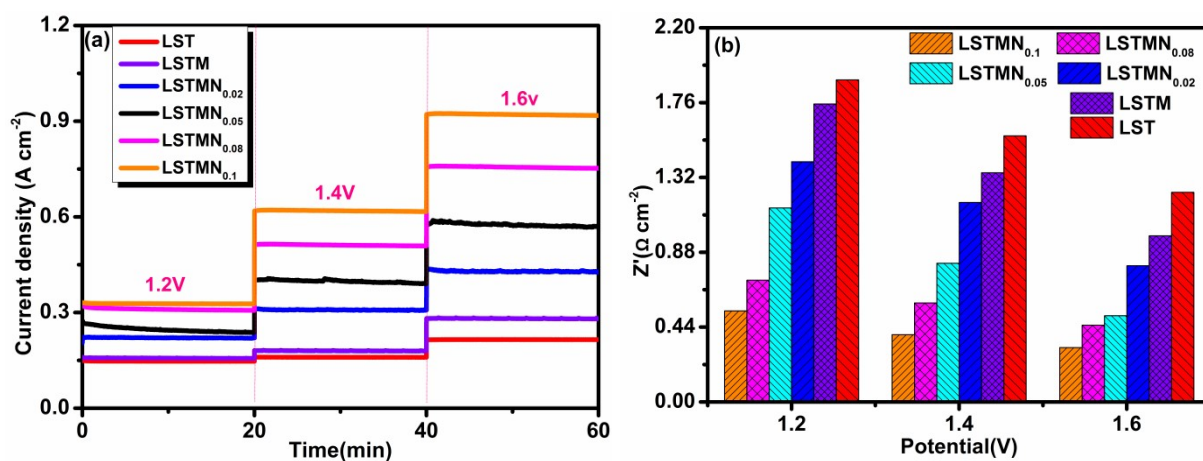

**Fig. S14** (a) The short-term performances of CO<sub>2</sub> electrolysis at different voltages; (b) Comparison of  $R_p$  for high-temperature CO<sub>2</sub> electrolysis with different electrodes.

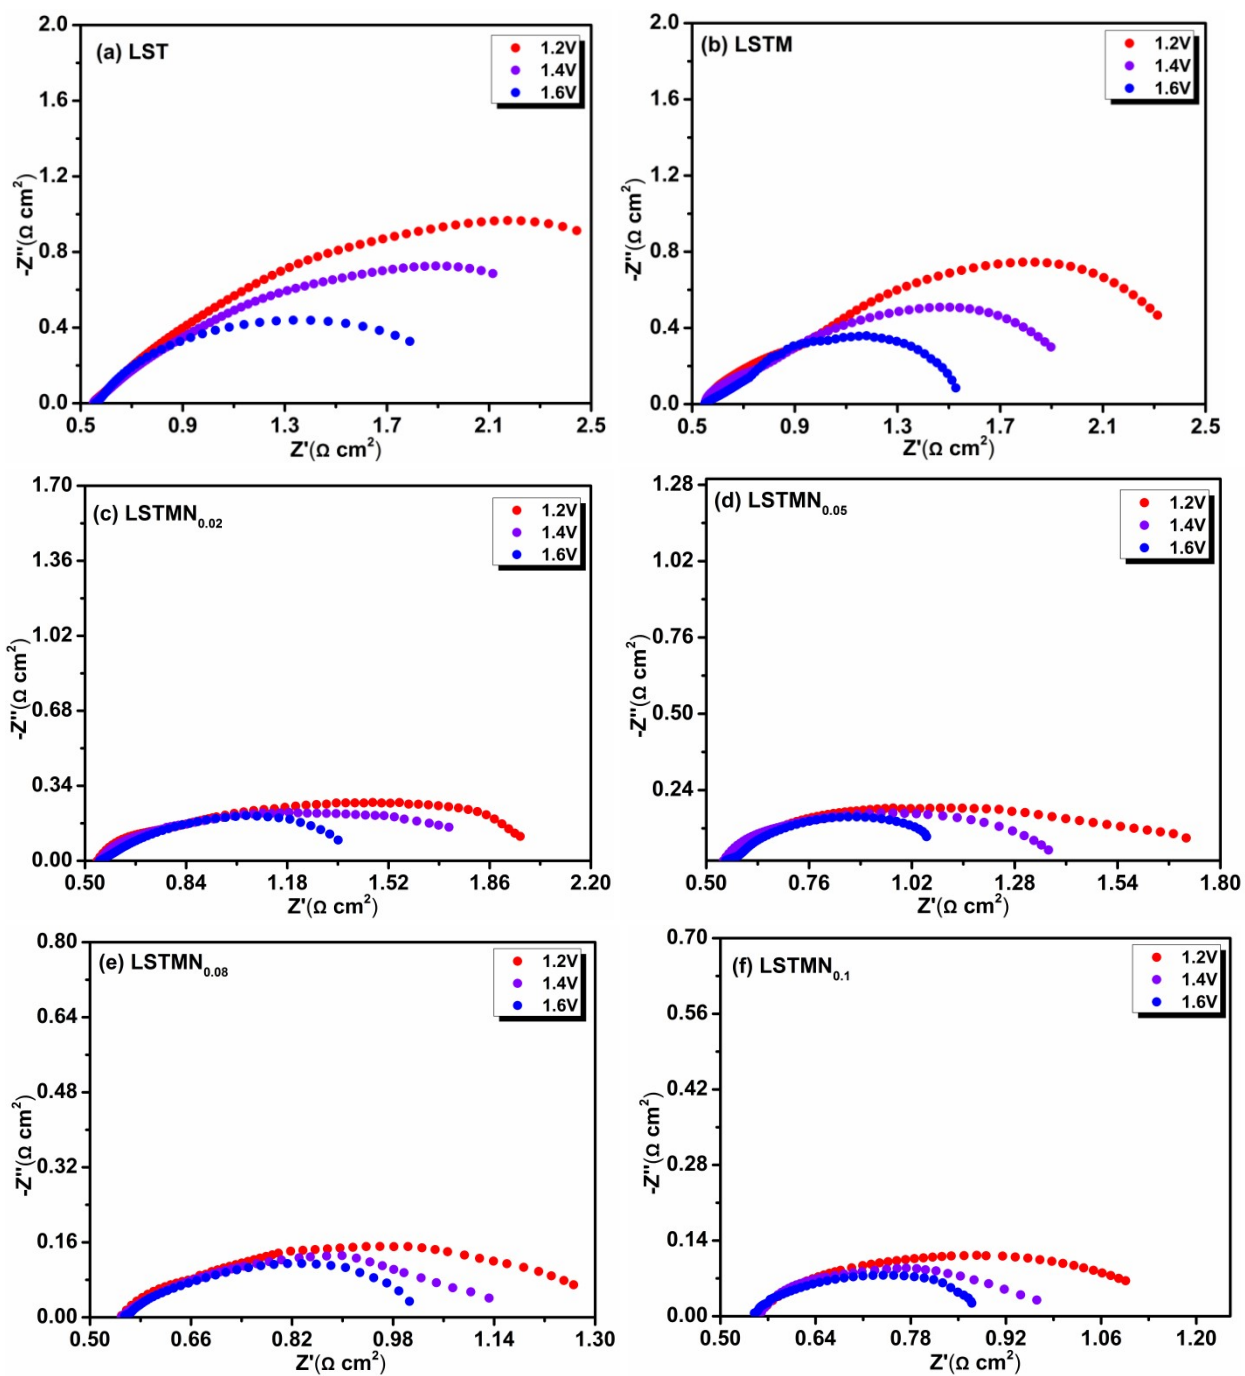

**Fig. S15** *In situ* AC impedance for electrolyzers based on (a) LST, (b) LSTM, (c) LSTMN<sub>0.02</sub>, (d) LSTMN<sub>0.05</sub>, (e) LSTMN<sub>0.08</sub> and (f) LSTMN<sub>0.1</sub> at various voltages.



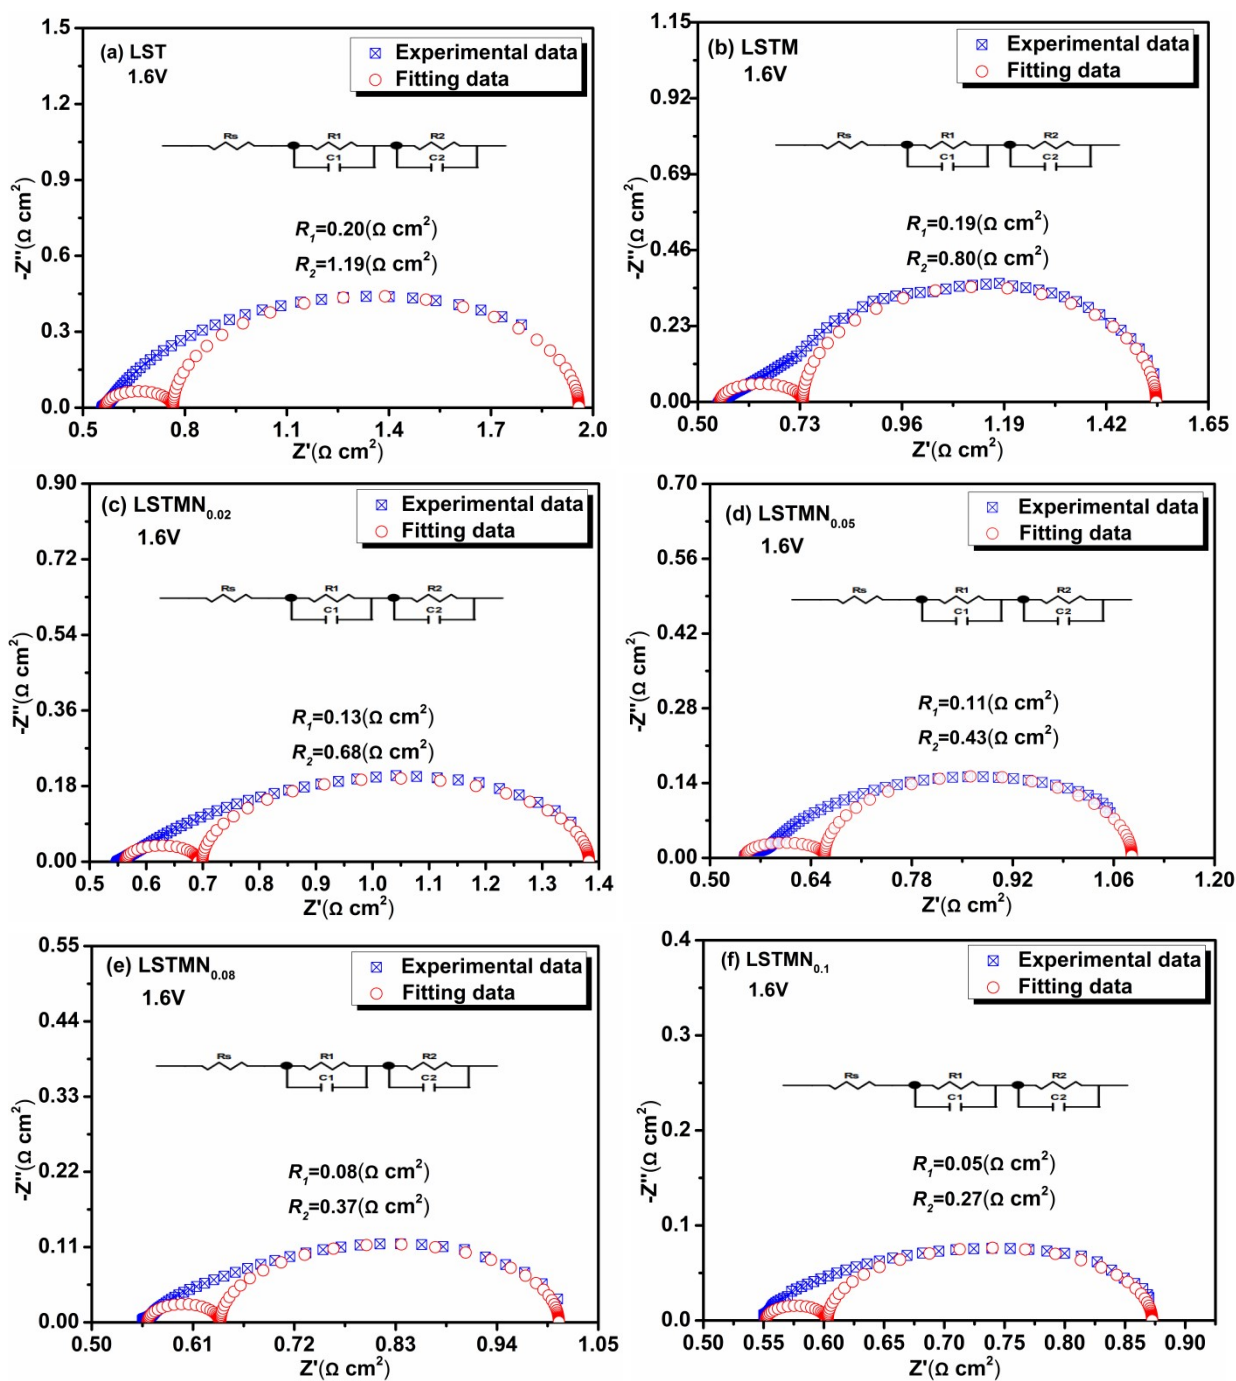

**Fig. S16** *In situ* AC impedance for electrolyser based on (a) LST, (b) LSTM, (c) LSTMN<sub>0.02</sub>, (d) LSTMN<sub>0.05</sub>, (e) LSTMN<sub>0.08</sub> and (f) LSTMN<sub>0.1</sub> at 1.6 V by Zview fitting.

**Table S1** The  $P''_{O_2}$  and  $P'_{O_2}$  represent the oxygen partial pressure on the feed and permeated side, respectively.

|                             | 600 °C                  | 650 °C                  | 700 °C                  | 750 °C                  | 800 °C                  |
|-----------------------------|-------------------------|-------------------------|-------------------------|-------------------------|-------------------------|
| $P''_{O_2}$ (Pa)            | $1.268 \times 10^{-19}$ | $3.004 \times 10^{-19}$ | $8.305 \times 10^{-19}$ | $5.606 \times 10^{-18}$ | $6.885 \times 10^{-17}$ |
| $P'_{O_2}$ (Pa)             | $1.641 \times 10^{-21}$ | $3.809 \times 10^{-21}$ | $9.826 \times 10^{-21}$ | $6.069 \times 10^{-20}$ | $7.005 \times 10^{-19}$ |
| $P''_{O_2} / P'_{O_2}$      | 77.27                   | 78.87                   | 84.52                   | 92.37                   | 98.29                   |
| $\ln(P''_{O_2} / P'_{O_2})$ | 4.347                   | 4.368                   | 4.437                   | 4.526                   | 4.588                   |
